# Supplementary material
Source: PubMed Central journal article supplement (PMC5516920)
Supplement: npjsba201630-s6.pdf [file npjsba201630-s6.pdf]

## Minimal model of MMP2 activation via MMP3, inhibited by TSP1

### ODEs:

$$d\_pM2\_dt = (-ReactionFlux1)$$

$$d\_M3\_dt = (-ReactionFlux1 + ReactionFlux2 - ReactionFlux3)$$

$$d\_M3\_pM2\_dt = (ReactionFlux1 - ReactionFlux2)$$

$$d\_M2\_dt = (ReactionFlux2)$$

$$d\_TSP1\_dt = (-ReactionFlux3)$$

$$d\_M3\_TSP1\_dt = (ReactionFlux3)$$

### Fluxes:

$$ReactionFlux1 = (kon\_M3\_pM2 * M3 * pM2 - koff\_M3\_pM2 * M3\_pM2)$$

$$ReactionFlux2 = (kact * M3\_pM2)$$

$$ReactionFlux3 = (kon\_M3\_TSP1 * M3 * TSP1 - koff\_M3\_TSP1 * M3\_TSP1)$$

### Parameter Values:

$$koff\_M3\_pM2 = 0.001$$

$$kon\_M3\_pM2 = 10000$$

$$kact = 0.0019$$

$$koff\_M3\_TSP1 = 2.1e-3$$

$$kon\_M3\_TSP1 = 1e+05$$

$$activeM9 = 0$$

$$foldChangeMMP9 = 0$$

$$M9\_M = 0$$

### Initial Conditions:

$$pM2 = 5.43e-09$$

$$M3 = 1.85e-08$$

$$M3\_pM2 = 0$$

$$M2 = 0$$

$$TSP1 = 1.47e-07$$

$$M3\_TSP1 = 0$$
