# Supplementary material
Source: PubMed Central journal article supplement (PMC5516920)

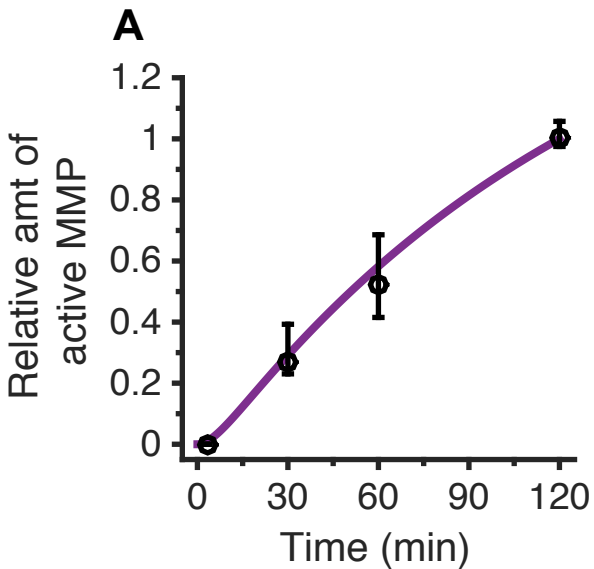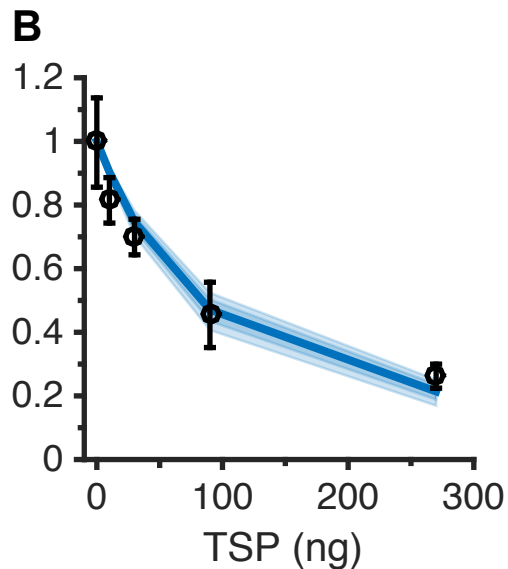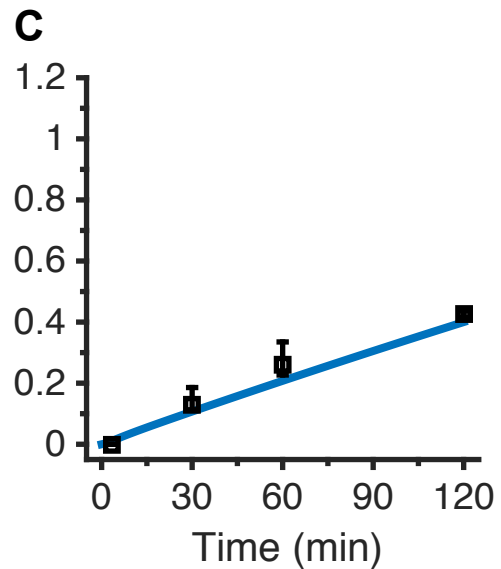

Supplement: npjsba201630-s5.pdf [file npjsba201630-s5.pdf]
